# Supplementary material
Source: Springer Nature journal article supplement (https://www.springermedizin.de/resource/supplementary/12913_2011_2449_MOESM1_ESM.pdf/9529834)
Supplement: MOESM1 [file 9529834]

Figure. Predicted probabilities\* for control of hypertension according to HPSA county residence and insurance status

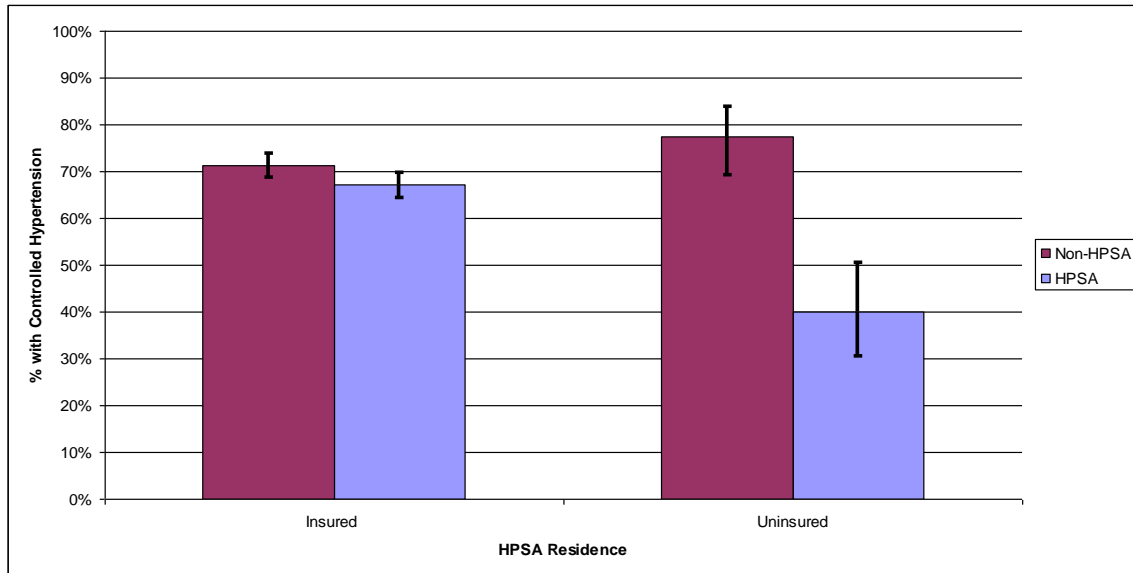

\* Error bars represent calculated 95% confidence intervals for predicted probabilities

‡Hypertension was defined as having a blood pressure of 140/90 or greater (130/80 or greater if the participant also had diabetes or chronic kidney disease, defined as estimated glomerular filtration rate (eGFR) <60 ml/min/1.73m<sup>2</sup>), or report of being told by a doctor or nurse they had hypertension.

\*Control was based on having blood pressure below the defined cut points among those being treated for hypertension.

†Adjusted for age, race, gender, income, education, alcohol use, tobacco use, exercise, medication adherence, and BMI category
